# Supplementary material for: Self-biased silicon transistor with a piezoelectric gate for an efficient mechanical energy harvesting device
Source: Royal Society of Chemistry journal article supplement (doi:10.1039/d4nr04090b), 2025-01-01
Supplement: d4nr04090b1.pdf [file d4nr04090b1.pdf]

## Self-Biased Silicon Transistor with Piezoelectric Gate for Efficient Mechanical Energy Harvesting Device

Utkarsh Pandey, Nila Pal, Sandeep Dahiya, Sobhan Hazra and Bhola N. Pal\*

School of Materials Science and Technology, Indian Institute of Technology (Banaras Hindu University), Varanasi-221005, India,

Corresponding author E-mail ID: [bnpal.mst@iitbhu.ac.in](mailto:bnpal.mst@iitbhu.ac.in)

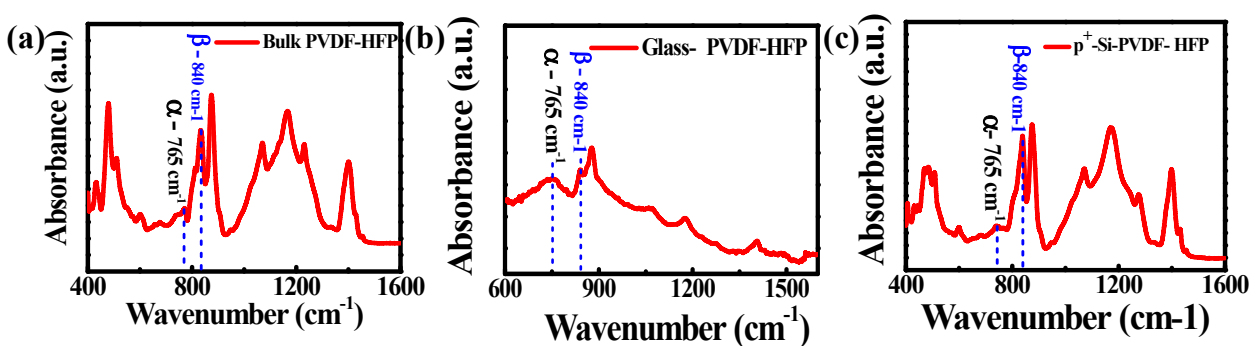

**Figure SI 1.** The ATR-FTIR absorbance spectra of the PVDF-HFP (a) Bulk, and thin film on (b) glass substrate, as well as (c)  $\text{p}^+$ -Si substrate.

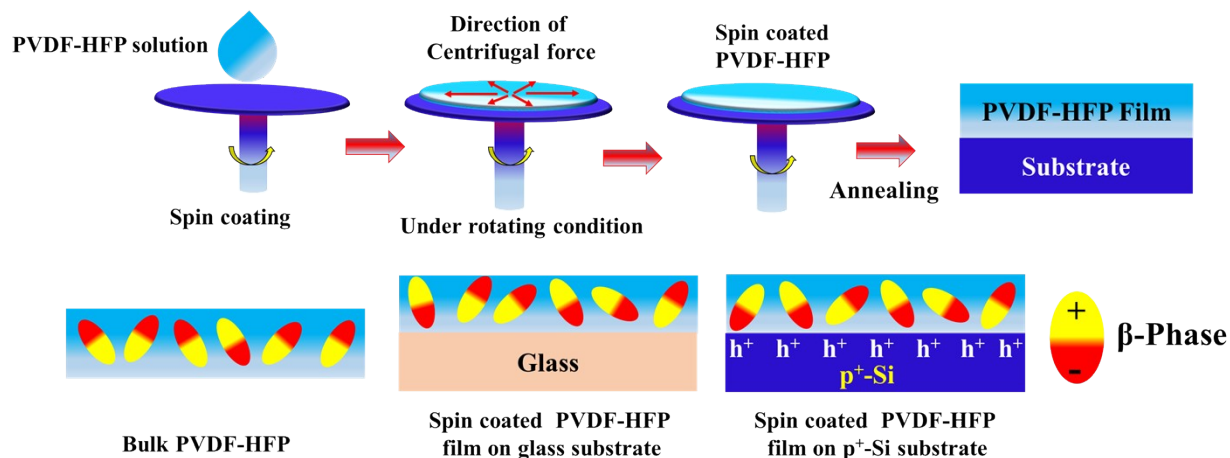

**Figure SI 2.** Schematic representation of Self-polarisation in the spin-coated PVDF-HFP thin film.

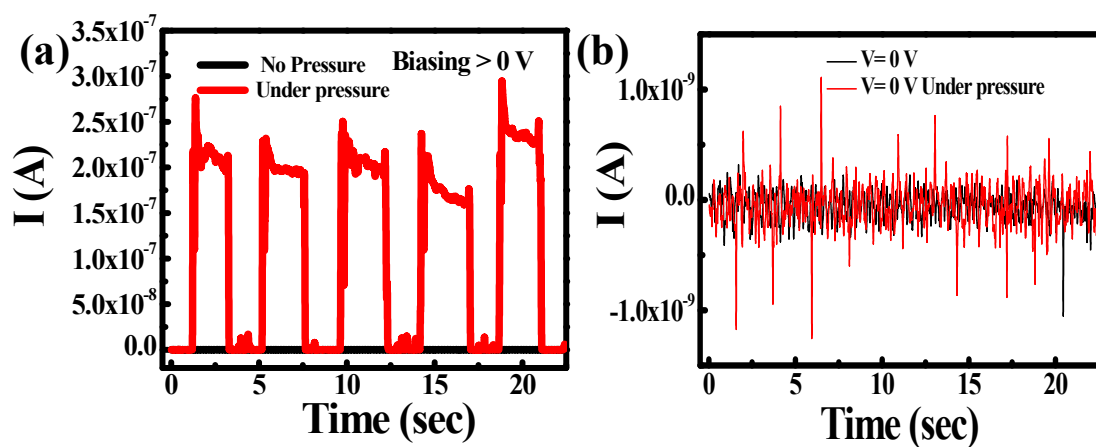

**Figure SI 3.** Transient response of the device with symmetric electrode under 4 bar cyclic pressure (a) under biasing ( $V = 0.5$  V) condition and (b) under self-biasing condition ( $V = 0$  V).

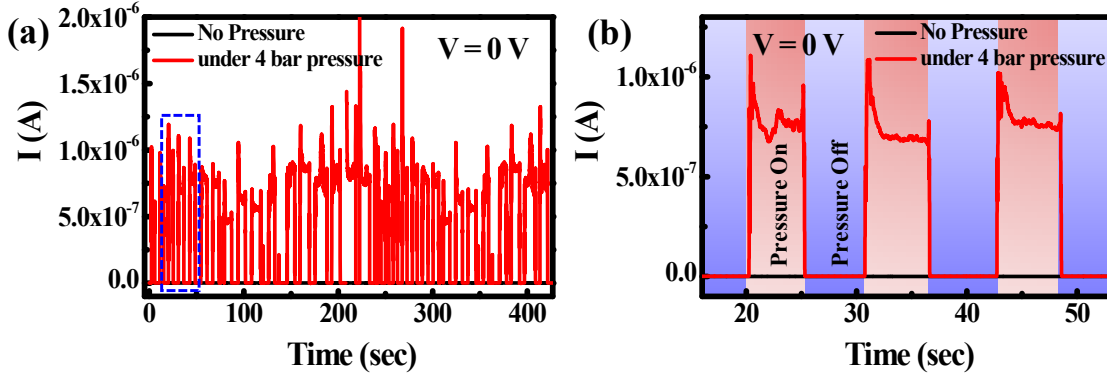

**Figure SI 4.** Repeatability test across to assess the device's performance over time for (a) multiple cycles and (b) zoomed potation (blue dotted region).

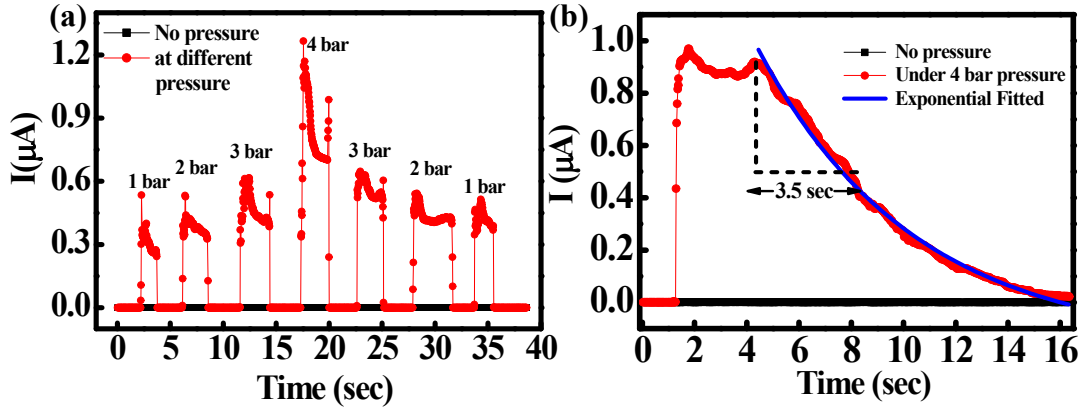

**Figure SI 5** (a) Optimum Pressure application test for maximum power extraction from the device and (b) I-t curve under constant pressure for a long period.

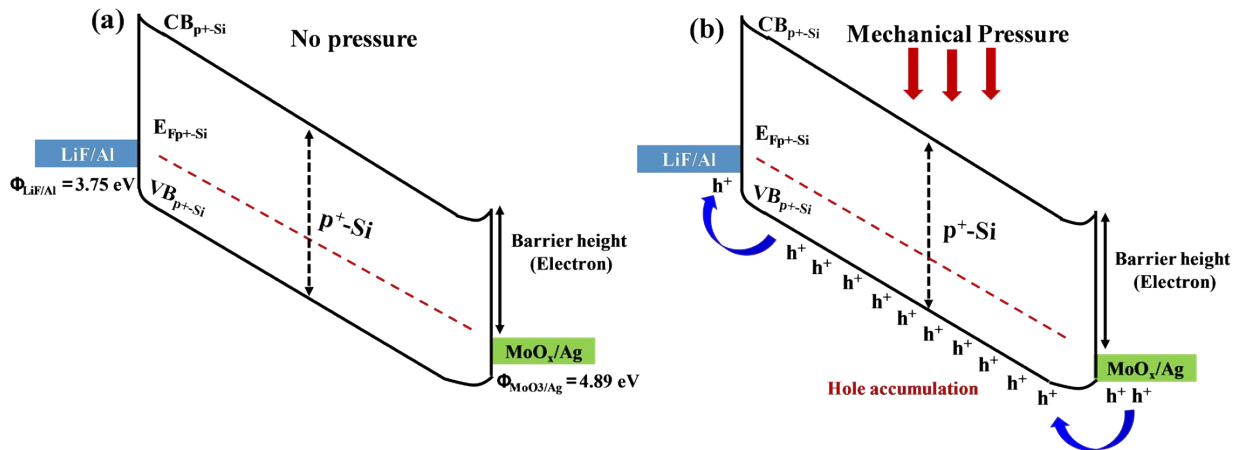

**Figure SI 6.** Band diagram of the device (a) under No pressure and (b) under mechanical pressure (accumulation mode)
